# Supplementary material
Source: Frontiers journal article supplement (https://www.frontiersin.org/articles/312970)

Supplementary material 4: Dissolved amino acid (DAA) spectra of three undisturbed and two disturbed sites.

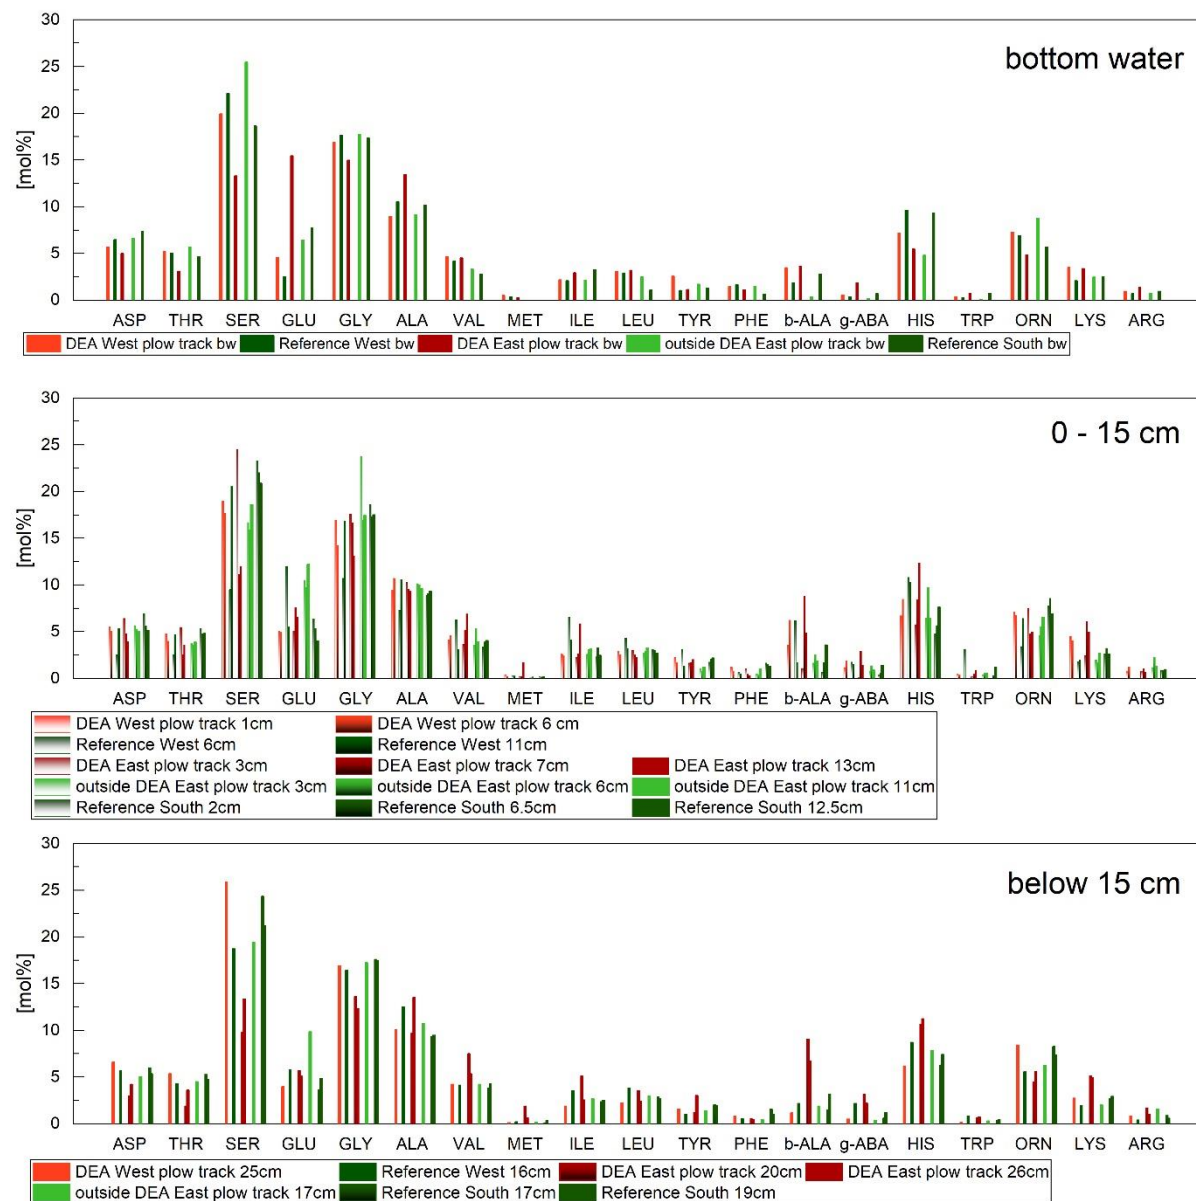

Supplement: Data_Sheet_4.pdf [file Data_Sheet_4.pdf]
